# Supplementary material for: Molecular Characterization of Rotavirus C from Rescued Sloth Bears, India: Evidence of Zooanthroponotic Transmission
Source: MDPI journal article supplement (doi:10.3390/pathogens12070934), 2023-07-13
Supplement: s1 [file s1]

Supplementary Table S1: Best templates used for structure prediction for VP6, VP7 and NSP4 proteins from different host

| Proteins | Accession ID, Host, Country, Strain | Best templates                                                | C-score |
|----------|-------------------------------------|---------------------------------------------------------------|---------|
| NSP4     | MN395882.1, Human, BRA, SD137       | 5lqxV, 1fewA, 7m6kA, 5o8kA, 4cr2A, 5j3nA, 7apkG, 1vt4A, 2h7oA | -3.84   |
|          | KY783644.1,Pig,IND,Por-993          | 5j3nA, 1fewA, 7m6kA, 6wlbA, 4cr2A, 7apkG, 1vt4A, 6ek4A, 2pff  | -4.05   |
|          | KX442662.1,SB,IND,UP-SB37           | 5j3nA, 1fewA, 7m6kA, 6wlbA, 4cr2A, 7apkG, 1vt4A, 6ek4A, 2pff  | -4.02   |
| VP6      | KX353812.1,Sloth-bear,IND,UP-SB21   | 3kz4O, 3kz4A, 7twcA, 3kz4, 1qhdA, 3kz4O, 7aqxA                | -1.84   |
|          | KX442660.1,Sloth-bear,IND,UP-SB37   | 3kz4O, 3kz4A, 7z7hF, 3kz4, 1qhdA, 7tcrC                       | -1.60   |
|          | AF162434.1,Bovine,USA,WD534tc       | 3kz4O, 3kz4A, 7qfpA, 3kz4, 1qhdA, 7aqxA                       | 1.84    |
|          | KT206195.1,Human,ITA,PR713          | 3kz4O, 3kz4A, 7qfpA, 3kz4, 1qhdA, 7acyA                       | 1.83    |
|          | KX374497.1,Pig,IND,AP-20            | 3kz4O, 3kz4A, 7qfpA, 3kz4, 1qhdA, 7tcrC                       | 1.62    |
| VP7      | KX353813.1,Sloth-bear,IND,UP-SB19   | 3gztQ, 3fmgA, 7fivB, 3gzt, 7rwkA                              | -2.05   |
|          | KX442661.1,Sloth-bear,IND,UP-SB37   | 3gztQ, 3fmgA, 7fivB, 3gzt, 7pe9I                              | -1.90   |
|          | AF225554.1,Human,T97,190            | 3gztQ, 3fmgA, 7fivB, 3gzt, 7rwkA                              | -2.05   |
|          | AB905210.1,Pig,CJ10-1               | 3gztQ, 3fmgA, 7fivB, 3gzt, 7rwkA                              | -1.94   |

Supplementary Table S2: BLAST results of VP6 UP-SB37 gene from sloth bear with accession ID, host, country and strain details along with sequence identity and query coverage

| S.No. | Accession ID, Host, Country, Strain | % coverage | % identity |
|-------|-------------------------------------|------------|------------|
| 1.    | KX442660.1,Sloth-bear,IND,UP-SB37   | 100%       | 100.00%    |
| 2.    | KX374497.1,Pig,IND,AP-20            | 100%       | 99.67%     |

|     |                                 |      |        |
|-----|---------------------------------|------|--------|
| 3.  | KX374486.1,Pig,IND,UP-404       | 99%  | 99.67% |
| 4.  | KX374491.1,Pig,IND,TRI-547      | 99%  | 99.50% |
| 5.  | KX374489.1,Pig,IND,TRI-542      | 99%  | 99.50% |
| 6.  | KX374487.1,Pig,IND,UP-405       | 99%  | 99.50% |
| 7.  | KX374500.1,Pig,IND,KL-215       | 99%  | 99.50% |
| 8.  | KX374499.1,Pig,IND,KL-205       | 99%  | 99.50% |
| 9.  | KT932963.1,Pig,IND,ASM-140      | 100% | 99.34% |
| 10. | KX374484.1,Pig,IND,ASM-896      | 100% | 99.18% |
| 11. | KX374496.1,Pig,IND,AP-19        | 99%  | 99.34% |
| 12. | KT932962.1,Pig,IND,ASM-132      | 100% | 99.01% |
| 13. | KT206195.1,Human,ITA,PR713      | 100% | 99.01% |
| 14. | MG709378.1,Human,IND,NIV1418974 | 100% | 98.85% |
| 15. | KX374492.1,Pig,IND,KL-224       | 99%  | 98.84% |
| 16. | MN206055.1,Hu,RUS,NS17-A1035    | 100% | 98.68% |
| 17. | MG709376.1,Human,IND,NIV8831    | 100% | 98.68% |
| 18. | MN206066.1,Hu,RUS,NS18-A1602    | 100% | 98.35% |
| 19. | LC129064.1,Human,JPN,OS-270     | 100% | 98.35% |
| 20. | AY795898.1,Human,V508           | 100% | 98.35% |
| 21. | AY786571.1,Human,V966           | 100% | 98.35% |
| 22. | AY770980.1,Human,v508           | 100% | 98.19% |
| 23. | MF422080.1,human,ARG,H-653      | 100% | 97.86% |
| 24. | HQ185636.1,Human,BS347          | 100% | 97.86% |
| 25. | AM118019.1,Human,BCN9           | 100% | 97.86% |
| 26. | AY786570.1,Human,V460           | 99%  | 97.52% |
| 27. | AF325805.1,Human,Jajeri         | 99%  | 97.52% |
| 28. | MG709377.1,Human,IND,NIV22208   | 100% | 97.36% |
| 29. | KT206184.1,Human,ITA,PR2593     | 100% | 97.36% |
| 30. | EF528570.1,Human,CHN,Wu82       | 100% | 97.36% |
| 31. | JN934895.2,Human,RUS,Omsk08-436 | 100% | 97.20% |

|     |                                 |      |        |
|-----|---------------------------------|------|--------|
| 32. | GU592517.3,Human,RUS,Nsk08-3414 | 100% | 97.20% |
| 33. | GU592519.2,Human,RUS,Nsk09-B43  | 100% | 97.20% |
| 34. | AB533509.2,Human,Y08-1          | 100% | 97.20% |
| 35. | HQ896714.1,Human,CAU 10-312     | 100% | 97.20% |
| 36. | HQ185667.1,Human,OH567          | 100% | 97.20% |
| 37. | HQ185656.1,Human,YNR001         | 100% | 97.20% |
| 38. | LC129063.1,Human,JPN,HO-65      | 100% | 97.03% |
| 39. | KP735976.1,Human,RUS,Nsk09-B11  | 100% | 97.03% |
| 40. | KP776604.1,Human,HUN,ERN6233    | 100% | 97.03% |
| 41. | KP776603.1,Human,HUN,ERN6210    | 100% | 97.03% |
| 42. | AB648915.1,Human,Y11-1          | 100% | 97.03% |
| 43. | GU199224.1,Human,Icheon         | 100% | 97.03% |
| 44. | EF641110.1,Human,CMH004,03      | 100% | 97.03% |
| 45. | AB008672.1,Human,JPN,208        | 100% | 97.03% |
| 46. | KY865348.1,Human,CHN,SJZ217     | 100% | 96.87% |
| 47. | KP735972.1,Human,RUS,Omsk08-437 | 100% | 96.87% |
| 48. | NC_007570.1,Human,UK,Bristol    | 100% | 96.87% |
| 49. | KM886901.1,Human,Chungnam       | 100% | 96.87% |
| 50. | AB740140.1,Human,Y12-1          | 100% | 96.87% |
| 51. | AB533513.2,Human,Y09-1          | 100% | 96.87% |
| 52. | X59843.2,Human,Bristol          | 100% | 96.87% |
| 53. | M94156.1,Human,UK,Preston       | 100% | 96.87% |
| 54. | AB499614.1,Human,GUP188         | 100% | 96.71% |
| 55. | MN206044.1,Hu,RUS,NS17-A970     | 100% | 96.71% |
| 56. | LC129065.1,Human,JPN,YA-27      | 100% | 96.71% |
| 57. | LC129061.1,Human,JPN,HO-63      | 100% | 96.71% |
| 58. | LC129060.1,Human,JPN,HO-62      | 100% | 96.71% |
| 59. | LC129058.1,Human,JPN,HI-49      | 100% | 96.71% |
| 60. | KT355391.1,Human,CAU13-1-77     | 100% | 96.71% |

|     |                                 |      |        |
|-----|---------------------------------|------|--------|
| 61. | KT284781.1,Human,CAU14-1-242    | 100% | 96.71% |
| 62. | KP342039.1,Human,CHN,SZ272      | 100% | 96.71% |
| 63. | AB740143.1,Human,Y12-2          | 100% | 96.71% |
| 64. | AB533508.2,Human,Y06-1          | 100% | 96.71% |
| 65. | KY062652.1,Human,RUS,NS16-A97   | 100% | 96.54% |
| 66. | LC129059.1,Human,JPN,HO-61      | 100% | 96.54% |
| 67. | KP342028.1,Human,CHN,SZ94       | 100% | 96.54% |
| 68. | M94155.1,Human,UK,Belm          | 100% | 96.21% |
| 69. | AM118020.1,Human,BCN21          | 99%  | 96.04% |
| 70. | AM118018.1,Human,BCN6           | 99%  | 96.04% |
| 71. | GU592518.3,Human,RUS,Omsk08-386 | 99%  | 95.54% |
| 72. | AF325806.1,Human,Moduganari     | 100% | 94.89% |
| 73. | MK953034.1,Pig,ESP,VC20B        | 99%  | 85.01% |
| 74. | MK953029.1,Pig,ESP,C247         | 99%  | 84.32% |
| 75. | MK953038.1,Pig,ESP,C429         | 99%  | 84.41% |
| 76. | M94157.1,Pig,Cowden             | 99%  | 83.94% |
| 77. | M29287.1,Pig,Cowden             | 99%  | 83.44% |
| 78. | KX362496.1,Pig,VNM,14249_26     | 99%  | 83.11% |
| 79. | KX362485.1,Pig,VNM,14249_25     | 99%  | 83.11% |
| 80. | KX362460.1,Pig,VNM,12130_53     | 99%  | 83.11% |
| 81. | KT281835.1,Pig,BRA,UEL-576      | 99%  | 82.98% |
| 82. | KX453795.1,Pig,IND,UP-101       | 99%  | 82.78% |
| 83. | KX374480.1,Pig,IND,UP-100       | 99%  | 82.78% |
| 84. | AB889512.1,Pig,CJ10-1           | 99%  | 82.78% |
| 85. | MK953028.1,Pig,ESP,P1C          | 99%  | 82.70% |
| 86. | KT281832.1,Pig,BRA,UEL-541      | 95%  | 83.33% |
| 87. | MT771554.1,Pig,USA,KS_7894      | 96%  | 83.25% |
| 88. | MG451700.1,Pig,USA,NC52         | 95%  | 83.30% |
| 89. | KT281833.1,Pig,BRA,UEL-554      | 95%  | 83.16% |

|      |                               |     |        |
|------|-------------------------------|-----|--------|
| 90.  | MG451710.1,Pig,USA,MN66       | 99% | 82.42% |
| 91.  | AF162434.1,Bovine,USA,WD534tc | 99% | 82.45% |
| 92.  | MG451690.1,Pig,USA,NC38       | 99% | 82.09% |
| 93.  | MG451689.1,Pig,USA,NC37       | 99% | 82.09% |
| 94.  | MG451659.1,Pig,USA,IL9        | 99% | 82.09% |
| 95.  | MG451705.1,Pig,USA,MN57       | 99% | 82.09% |
| 96.  | MT771564.1,Pig,USA,MN_1246    | 99% | 81.98% |
| 97.  | MK953033.1,Pig,ESP,VC7C       | 99% | 81.88% |
| 98.  | MK953030.1,Pig,ESP,VT25C      | 99% | 81.88% |
| 99.  | AB889513.1,Pig,CJ13-6         | 95% | 82.47% |
| 100. | KT281829.1,Pig,UEL-217        | 99% | 81.59% |
| 101. | MG451678.1,Pig,USA,NC25       | 99% | 81.43% |
| 102. | MG451724.1,Pig,USA,IA78       | 99% | 81.26% |
| 103. | MG451674.1,Pig,USA,MN21       | 95% | 81.79% |
| 104. | MG451665.1,Pig,USA,WI13       | 95% | 81.44% |
| 105. | KX362507.1,Pig,VNM,14152_5    | 99% | 80.93% |
| 106. | MG451697.1,Pig,USA,IA46-3     | 99% | 80.46% |

Supplementary Table S3: BLAST results of VP6 UP-SB21 gene from sloth bear with accession ID, host, country and strain details along with sequence identity and query coverage

| S.No. | Accession ID, Host, Country, Strain | % coverage | % identity |
|-------|-------------------------------------|------------|------------|
| 1.    | KX353812.1,Sloth-bear,IND,UP-SB21   | 100%       | 100.00%    |
| 2.    | KX374483.1,Pig,IND,TRI-538          | 99%        | 99.63%     |
| 3.    | KX374481.1,Pig,IND,MIZ-275          | 100%       | 99.56%     |
| 4.    | KX374485.1,Pig,IND,NAG-995          | 99%        | 94.27%     |
| 5.    | KX374495.1,Pig,IND,NAG-993          | 99%        | 94.20%     |
| 6.    | HQ833829.1,Pig,CUK-5                | 100%       | 92.36%     |
| 7.    | KX374482.1,Pig,IND,UP-408           | 100%       | 91.62%     |
| 8.    | AB889518.1,Pig,CJ33-5               | 100%       | 91.48%     |
| 9.    | HQ323753.1,Pig,CUK-6                | 100%       | 91.48%     |

|     |                             |      |        |
|-----|-----------------------------|------|--------|
| 10. | AB889520.1,Pig,CJ59-32      | 100% | 91.40% |
| 11. | KJ814477.1,Pig,KOR,06-52-1  | 100% | 91.33% |
| 12. | AB889502.1,Pig,87-G2        | 100% | 91.03% |
| 13. | AB889501.1,Pig,86-K5        | 100% | 91.03% |
| 14. | AB889514.1,Pig,CJ16-4       | 100% | 90.89% |
| 15. | AB889519.1,Pig,CJ49-4       | 100% | 90.67% |
| 16. | AB889511.1,Pig,CJ3-6        | 100% | 90.66% |
| 17. | LC622317.1,Pig,JPN,Ishi-Im9 | 99%  | 90.56% |
| 18. | AB889503.1,Pig,87-I4        | 100% | 90.14% |
| 19. | LC122623.1,Pig,Ishi-1       | 97%  | 90.33% |
| 20. | AB889500.1,Pig,86-H5        | 100% | 89.70% |
| 21. | LC622340.1,Pig,JPN,Ishi-Ya1 | 100% | 89.70% |
| 22. | AB889499.1,Pig,86-H3        | 100% | 89.62% |
| 23. | AB889508.1,Pig,93-Z4        | 100% | 89.55% |
| 24. | AB889505.1,Pig,91-G10       | 100% | 89.47% |
| 25. | LC622352.1,Pig,JPN,Ishi-Ya3 | 99%  | 89.63% |
| 26. | AB889509.1,Pig,105-4        | 100% | 89.33% |
| 27. | AB889504.1,Pig,91-G7        | 100% | 89.33% |
| 28. | LC622305.1,Pig,JPN,Ishi-Im1 | 95%  | 90.12% |
| 29. | LC622374.1,Pig,JPN,HgYa2    | 98%  | 89.20% |
| 30. | KX362449.1,Pig,VNM,12129_51 | 99%  | 88.51% |
| 31. | LC622328.1,Pig,JPN,Ishi-Ka6 | 99%  | 88.49% |
| 32. | M94157.1,Pig,Cowden         | 100% | 88.22% |
| 33. | KX362496.1,Pig,VNM,14249_26 | 100% | 88.07% |
| 34. | LC122612.1,Pig,Tottori-KT01 | 96%  | 88.74% |
| 35. | M29287.1,Pig,Cowden         | 100% | 87.86% |
| 36. | KX362460.1,Pig,VNM,12130_53 | 98%  | 87.79% |
| 37. | MH282890.1,Pig,USA,OK.5.68  | 100% | 87.11% |
| 38. | AB889516.1,Pig,CJ31-6       | 100% | 86.52% |

|     |                               |      |        |
|-----|-------------------------------|------|--------|
| 39. | AB889517.1,Pig,CJ32-3         | 100% | 86.31% |
| 40. | AB889513.1,Pig,CJ13-6         | 100% | 86.22% |
| 41. | KM099256.1,Pig,CZE,P303       | 95%  | 87.05% |
| 42. | AF162434.1,Bovine,USA,WD534tc | 97%  | 86.67% |
| 43. | KJ814480.1,Pig,KOR,07-74-11   | 100% | 85.99% |
| 44. | FJ494690.1,,Pig,ROK,06-92-1   | 100% | 85.85% |
| 45. | AB889512.1,Pig,CJ10-1         | 100% | 85.77% |
| 46. | KM099257.1,,Pig,CZE,P21       | 95%  | 86.57% |
| 47. | KM099259.1,Pig,CZE,P59        | 95%  | 86.56% |
| 48. | KM099258.1,Pig,CZE,P44        | 95%  | 86.50% |
| 49. | LC122591.1,Pig,Tochigi-1-1    | 100% | 85.63% |
| 50. | AB889510.1,Pig,134-9          | 100% | 85.48% |
| 51. | KC164674.1,Pig,USA,RV0104     | 100% | 85.49% |
| 52. | KC164677.1,Pig,USA,RV0143     | 100% | 85.42% |
| 53. | AB889507.1,Pig,93-H5          | 100% | 85.19% |
| 54. | KJ814482.1,Pig,KOR,09-15-9    | 100% | 85.11% |
| 55. | KJ814481.1,Pig,KOR,09-15-7    | 100% | 85.11% |
| 56. | FJ494692.1,Pig,06-146-2       | 100% | 85.10% |
| 57. | MN809637.1,Pig,RV0143         | 98%  | 85.25% |
| 58. | GQ925781.1,Pig,ROK,CA-2       | 100% | 85.04% |
| 59. | KJ814483.1,Pig,KOR,08-128-1   | 100% | 84.96% |
| 60. | AB889515.1,Pig,CJ27-1         | 100% | 84.73% |
| 61. | HQ185636.1,Human,BS347        | 100% | 84.38% |
| 62. | KX374480.1,Pig,IND,UP-100     | 99%  | 84.11% |
| 63. | AM118019.1,Human,BCN9         | 99%  | 84.06% |
| 64. | AY786571.1,Human,V966         | 99%  | 83.99% |
| 65. | HQ185656.1,Human,YNR001       | 100% | 83.86% |
| 66. | EF528570.1,Human,china,Wu82   | 100% | 83.85% |
| 67. | AY795898.1,Human,V508         | 99%  | 83.91% |

|     |                                 |      |        |
|-----|---------------------------------|------|--------|
| 68. | AY770980.1,Human,v508           | 99%  | 83.91% |
| 69. | AF325805.1,Human,Jajeri         | 99%  | 83.91% |
| 70. | AB008672.1,Human,JPN,208        | 100% | 83.86% |
| 71. | KY865348.1,Human,CHN,SJZ217     | 99%  | 83.84% |
| 72. | KT355391.1,Human,CAU13-1-77     | 99%  | 83.84% |
| 73. | KT284781.1,Human,CAU14-1-242    | 99%  | 83.84% |
| 74. | KP342039.1,Human,CHN,SZ272      | 100% | 83.79% |
| 75. | KP342028.1,Human,CHN,SZ94       | 100% | 83.79% |
| 76. | KM886901.1Human,Chungnam        | 99%  | 83.84% |
| 77. | HQ185667.1,Human,OH567          | 100% | 83.79% |
| 78. | EF641110.1,Human,CMH004,03      | 99%  | 83.84% |
| 79. | LC129064.1,Human,JPN,OS-270     | 99%  | 83.83% |
| 80. | LC129060.1,Human,JPN,HO-62      | 99%  | 83.75% |
| 81. | LC129058.1,Human,JPN,HI-49      | 99%  | 83.75% |
| 82. | KT206195.1,Human,ITA,PR713      | 99%  | 83.77% |
| 83. | KT206184.1,Human,ITA,PR2593     | 99%  | 83.77% |
| 84. | NC_007570.1,Human,UK,Bristol    | 100% | 83.70% |
| 85. | KP776603.1,Human,HUN,ERN6210    | 99%  | 83.77% |
| 86. | X59843.2,Human,Bristol,4077-89  | 100% | 83.70% |
| 87. | KX374484.1,Pig,IND,ASM-896      | 99%  | 83.73% |
| 88. | LC129065.1,Human,JPN,YA-27      | 99%  | 83.81% |
| 89. | HQ896714.1,Human,CAU 10-312     | 99%  | 83.69% |
| 90. | LC129061.1,Human,JPN,HO-63      | 99%  | 83.72% |
| 91. | KP735972.1,Human,RUS,Omsk08-437 | 99%  | 83.69% |
| 92. | GU199224.1,Human,Icheon         | 100% | 83.64% |
| 93. | AM118020.1,Human,BCN21          | 99%  | 83.68% |
| 94. | JN934895.2,Human,RUS,Omsk08-436 | 99%  | 83.62% |
| 95. | KP735976.1,Human,RUS,Nsk09-B11  | 99%  | 83.62% |
| 96. | GU592519.2,Human,RUS,Nsk09-B43  | 99%  | 83.62% |

|     |                                 |      |        |
|-----|---------------------------------|------|--------|
| 97. | M94156.1,Human,Preston          | 99%  | 83.61% |
| 98. | LC129063.1,Human,JPN,HO-65      | 99%  | 83.62% |
| 99. | GU592517.3,Human,RUS,Nsk08-3414 | 99%  | 83.54% |
| 100 | AB499614.1,Human,GUP188         | 99%  | 83.51% |
| 101 | GU592518.3,Human,RUS,Omsk08-386 | 99%  | 83.46% |
| 102 | KJ814479.1,Pig,KOR,04-155-5     | 100% | 83.43% |
| 103 | AM118018.1,Human,BCN6           | 99%  | 83.46% |
| 104 | LC129059.1,Human,JPN,HO-61      | 98%  | 83.62% |
| 105 | MN206055.1,Hu,RUS,NS17-A1035    | 99%  | 83.32% |
| 106 | MN206044.1,Hu,RUS,NS17-A970     | 99%  | 83.32% |
| 107 | KY062652.1,Human,RUS,NS16-A97   | 99%  | 83.32% |
| 108 | MN206066.1,Hu,RUS,NS18-A1602    | 99%  | 83.17% |
| 109 | FJ494691.1,Pig,06-144-2         | 100% | 83.06% |
| 110 | AF325806.1,Human,Moduganari     | 99%  | 83.10% |
| 111 | AB874633.1,Bovine,Y/3/04        | 100% | 82.96% |
| 112 | LC622282.1,Bovine,JPN,Ishi-Mi21 | 99%  | 82.99% |
| 113 | MN809647.1,Pig,RV0104           | 99%  | 83.02% |
| 114 | LC622293.1,Bovine,JPN,Ishi-Mi39 | 99%  | 82.88% |
| 115 | AB874631.1,Bovine,Y/1/04        | 100% | 82.77% |
| 116 | KJ814478.1,Pig,KOR,04-105-2     | 100% | 82.69% |
| 117 | AB874634.1,Bovine,Y/08          | 100% | 82.65% |
| 118 | AB108680.1,Bovine,JPN,Yamagata  | 100% | 82.69% |
| 119 | M88768.1,Bovine,USA,Shintoku    | 100% | 82.51% |
| 120 | AB874630.1,Bovine,Y/03          | 100% | 82.43% |
| 121 | LC622271.1,Bovine,JPN,Ishi-Sa   | 98%  | 82.61% |
| 122 | AB874635.1,Bovine,Y/10          | 100% | 82.28% |
| 123 | AB738416.1,Bovine,Toyama        | 100% | 82.13% |

Supplementary Table S4: Codon-wise selection pressure shown for VP6 UP-SB37 gene of RCV virus from sloth bear and other hosts

| Codon | S | N | dS     | dN    | Selection Detected |
|-------|---|---|--------|-------|--------------------|
| 11    | 7 | 1 | 7.591  | 1.144 | Neg. p= 0.041      |
| 13    | 3 | 0 | 4.891  | 0     | Neg. p= 0.037      |
| 15    | 3 | 0 | 4.891  | 0     | Neg. p= 0.037      |
| 16    | 3 | 0 | 6.352  | 0     | Neg. p= 0.022      |
| 18    | 5 | 0 | 6.997  | 0     | Neg. p= 0.004      |
| 19    | 3 | 0 | 4.19   | 0     | Neg. p= 0.041      |
| 21    | 6 | 0 | 7.357  | 0     | Neg. p= 0.003      |
| 22    | 4 | 0 | 7.083  | 0     | Neg. p= 0.006      |
| 28    | 4 | 0 | 5.536  | 0     | Neg. p= 0.012      |
| 29    | 7 | 0 | 9.689  | 0     | Neg. p= 0          |
| 30    | 3 | 0 | 4.36   | 0     | Neg. p= 0.032      |
| 31    | 6 | 0 | 10.148 | 0     | Neg. p= 0.001      |
| 32    | 7 | 0 | 9.689  | 0     | Neg. p= 0          |
| 34    | 9 | 0 | 12.457 | 0     | Neg. p= 0          |
| 36    | 4 | 1 | 7.384  | 0.615 | Neg. p= 0.016      |
| 37    | 3 | 1 | 6.189  | 0.594 | Neg. p= 0.037      |
| 38    | 6 | 1 | 8.663  | 0.678 | Neg. p= 0.005      |
| 40    | 4 | 0 | 6.388  | 0     | Neg. p= 0.028      |
| 41    | 5 | 0 | 6.92   | 0     | Neg. p= 0.004      |
| 42    | 2 | 0 | 3.739  | 0     | Neg. p= 0.061      |
| 44    | 9 | 2 | 8.193  | 2.087 | Neg. p= 0.053      |
| 48    | 4 | 0 | 3.649  | 0     | Neg. p= 0.092      |
| 50    | 7 | 0 | 9.689  | 0     | Neg. p= 0          |
| 51    | 2 | 0 | 3.683  | 0     | Neg. p= 0.063      |
| 52    | 5 | 2 | 7.094  | 1.367 | Neg. p= 0.041      |
| 53    | 2 | 0 | 2.606  | 0     | Neg. p= 0.066      |
| 54    | 2 | 0 | 2.689  | 0     | Neg. p= 0.061      |
| 55    | 3 | 0 | 3      | 0     | Neg. p= 0.037      |

|    |    |   |        |       |               |
|----|----|---|--------|-------|---------------|
| 57 | 7  | 0 | 7      | 0     | Neg. p= 0.001 |
| 59 | 3  | 0 | 3      | 0     | Neg. p= 0.04  |
| 60 | 7  | 0 | 7      | 0     | Neg. p= 0     |
| 61 | 9  | 0 | 10.797 | 0     | Neg. p= 0     |
| 62 | 5  | 0 | 5      | 0     | Neg. p= 0.004 |
| 63 | 5  | 2 | 6.383  | 1.477 | Neg. p= 0.067 |
| 64 | 5  | 0 | 7.208  | 0     | Neg. p= 0.001 |
| 65 | 5  | 1 | 6.899  | 0.454 | Neg. p= 0.004 |
| 67 | 7  | 3 | 8.822  | 1.36  | Neg. p= 0.005 |
| 68 | 3  | 0 | 4.077  | 0     | Neg. p= 0.015 |
| 69 | 8  | 0 | 9.623  | 0     | Neg. p= 0.001 |
| 70 | 8  | 0 | 5.7    | 0     | Neg. p= 0.002 |
| 71 | 4  | 0 | 4      | 0     | Neg. p= 0.012 |
| 72 | 5  | 0 | 6.825  | 0     | Neg. p= 0.005 |
| 73 | 14 | 0 | 8.357  | 0     | Neg. p= 0.001 |
| 74 | 3  | 0 | 3      | 0     | Neg. p= 0.037 |
| 75 | 5  | 0 | 5      | 0     | Neg. p= 0.004 |
| 76 | 5  | 0 | 5      | 0     | Neg. p= 0.004 |
| 77 | 12 | 0 | 7.869  | 0     | Neg. p= 0     |
| 78 | 12 | 1 | 8.172  | 0.747 | Neg. p= 0.003 |
| 79 | 3  | 0 | 4.079  | 0     | Neg. p= 0.015 |
| 80 | 8  | 1 | 5.467  | 0.772 | Neg. p= 0.03  |
| 82 | 3  | 0 | 4.083  | 0     | Neg. p= 0.015 |
| 83 | 4  | 0 | 5.163  | 0     | Neg. p= 0.004 |
| 86 | 3  | 0 | 4.354  | 0     | Neg. p= 0.035 |
| 87 | 7  | 1 | 7      | 0.505 | Neg. p= 0.003 |
| 88 | 6  | 1 | 6      | 0.5   | Neg. p= 0.007 |
| 89 | 3  | 0 | 3.796  | 0     | Neg. p= 0.023 |
| 90 | 6  | 4 | 7.458  | 1.822 | Neg. p= 0.028 |

|     |     |     |       |       |               |
|-----|-----|-----|-------|-------|---------------|
| 91  | 8.5 | 6.5 | 9.773 | 3.051 | Neg. p= 0.027 |
| 92  | 5   | 0   | 5.257 | 0     | Neg. p= 0.003 |
| 93  | 3   | 0   | 4.059 | 0     | Neg. p= 0.015 |
| 94  | 4   | 1   | 5.42  | 0.489 | Neg. p= 0.019 |
| 95  | 11  | 1   | 7.13  | 0.812 | Neg. p= 0.009 |
| 96  | 8   | 1   | 8     | 0.505 | Neg. p= 0.001 |
| 97  | 4   | 1   | 4     | 0.521 | Neg. p= 0.05  |
| 98  | 4   | 0   | 5.299 | 0     | Neg. p= 0.004 |
| 100 | 3   | 0   | 4.254 | 0     | Neg. p= 0.014 |
| 101 | 5   | 1   | 5     | 0.5   | Neg. p= 0.018 |
| 102 | 5   | 0   | 5     | 0     | Neg. p= 0.004 |
| 105 | 2   | 0   | 2.676 | 0     | Neg. p= 0.062 |
| 106 | 4   | 0   | 5.762 | 0     | Neg. p= 0.003 |
| 107 | 4   | 2   | 5.541 | 0.878 | Neg. p= 0.033 |
| 110 | 4   | 0   | 5.772 | 0     | Neg. p= 0.003 |
| 111 | 11  | 1   | 11    | 0.5   | Neg. p= 0     |
| 113 | 5   | 0   | 6.088 | 0     | Neg. p= 0.002 |
| 115 | 3   | 0   | 3     | 0     | Neg. p= 0.039 |
| 117 | 3   | 0   | 4.309 | 0     | Neg. p= 0.036 |
| 119 | 7   | 0   | 8.798 | 0     | Neg. p= 0.001 |
| 120 | 7   | 0   | 7     | 0     | Neg. p= 0     |
| 121 | 4   | 0   | 4     | 0     | Neg. p= 0.012 |
| 122 | 7   | 4   | 7     | 2     | Neg. p= 0.039 |
| 123 | 5   | 0   | 4.964 | 0     | Neg. p= 0.004 |
| 124 | 2   | 0   | 5.156 | 0     | Neg. p= 0.017 |
| 126 | 10  | 0   | 7.046 | 0     | Neg. p= 0.001 |
| 132 | 7   | 1   | 9.424 | 0.494 | Neg. p= 0.001 |
| 133 | 9   | 0   | 9     | 0     | Neg. p= 0     |
| 136 | 6   | 1   | 8.12  | 0.442 | Neg. p= 0.001 |

|     |     |     |        |       |               |
|-----|-----|-----|--------|-------|---------------|
| 137 | 6   | 1   | 7.614  | 0.452 | Neg. p= 0.002 |
| 138 | 11  | 1   | 13.573 | 0.457 | Neg. p= 0     |
| 142 | 4   | 0   | 4      | 0     | Neg. p= 0.012 |
| 143 | 4   | 0   | 4.169  | 0     | Neg. p= 0.01  |
| 144 | 4   | 0   | 5.338  | 0     | Neg. p= 0.005 |
| 145 | 2   | 0   | 2.71   | 0     | Neg. p= 0.06  |
| 149 | 5   | 0   | 6.556  | 0     | Neg. p= 0.006 |
| 150 | 6   | 0   | 6      | 0     | Neg. p= 0.002 |
| 151 | 5   | 0   | 6.233  | 0     | Neg. p= 0.002 |
| 152 | 4   | 0   | 3.999  | 0     | Neg. p= 0.012 |
| 153 | 7   | 0   | 9.366  | 0     | Neg. p= 0     |
| 155 | 4   | 0   | 4      | 0     | Neg. p= 0.012 |
| 156 | 9   | 0   | 9      | 0     | Neg. p= 0     |
| 157 | 5   | 0   | 6.763  | 0     | Neg. p= 0.001 |
| 158 | 12  | 0   | 14.767 | 0     | Neg. p= 0     |
| 159 | 12  | 0   | 13.946 | 0     | Neg. p= 0     |
| 161 | 2   | 0   | 2.723  | 0     | Neg. p= 0.06  |
| 162 | 8   | 1   | 8.006  | 0.5   | Neg. p= 0.001 |
| 164 | 11  | 7   | 9.967  | 3.786 | Neg. p= 0.035 |
| 166 | 5   | 0   | 7.095  | 0     | Neg. p= 0.001 |
| 167 | 2   | 0   | 2.711  | 0     | Neg. p= 0.073 |
| 168 | 3   | 1   | 3.952  | 0.496 | Neg. p= 0.065 |
| 169 | 3   | 0   | 4.056  | 0     | Neg. p= 0.015 |
| 170 | 6   | 0   | 6      | 0     | Neg. p= 0.002 |
| 171 | 10  | 0   | 12.183 | 0     | Neg. p= 0     |
| 172 | 8   | 1   | 8.442  | 0.487 | Neg. p= 0.001 |
| 174 | 7   | 0   | 9.505  | 0     | Neg. p= 0.001 |
| 175 | 7   | 0   | 6.796  | 0     | Neg. p= 0.001 |
| 177 | 7.5 | 6.5 | 9.22   | 2.976 | Neg. p= 0.037 |

|     |    |   |        |       |               |
|-----|----|---|--------|-------|---------------|
| 181 | 4  | 0 | 4      | 0     | Neg. p= 0.014 |
| 182 | 8  | 1 | 9.881  | 0.457 | Neg. p= 0     |
| 183 | 10 | 3 | 10.057 | 1.496 | Neg. p= 0.002 |
| 185 | 6  | 0 | 6      | 0     | Neg. p= 0.002 |
| 186 | 14 | 1 | 9.005  | 0.81  | Neg. p= 0.002 |
| 187 | 9  | 0 | 10.266 | 0     | Neg. p= 0     |
| 188 | 3  | 0 | 4.04   | 0     | Neg. p= 0.02  |
| 189 | 10 | 0 | 12.191 | 0     | Neg. p= 0     |
| 191 | 5  | 2 | 5      | 1     | Neg. p= 0.045 |
| 193 | 6  | 0 | 7.905  | 0     | Neg. p= 0     |
| 196 | 5  | 0 | 6.624  | 0     | Neg. p= 0.006 |
| 197 | 4  | 1 | 4.176  | 0.49  | Neg. p= 0.039 |
| 198 | 5  | 0 | 5      | 0     | Neg. p= 0.004 |
| 199 | 5  | 0 | 5      | 0     | Neg. p= 0.004 |
| 200 | 3  | 0 | 4.071  | 0     | Neg. p= 0.015 |
| 201 | 8  | 0 | 10.272 | 0     | Neg. p= 0     |
| 202 | 6  | 0 | 6      | 0     | Neg. p= 0.002 |
| 203 | 8  | 0 | 8      | 0     | Neg. p= 0     |
| 204 | 9  | 2 | 7.388  | 1.123 | Neg. p= 0.007 |
| 206 | 5  | 1 | 7.151  | 0.449 | Neg. p= 0.004 |
| 207 | 3  | 0 | 4.052  | 0     | Neg. p= 0.015 |
| 208 | 3  | 0 | 3      | 0     | Neg. p= 0.037 |
| 209 | 9  | 1 | 9.175  | 0.509 | Neg. p= 0     |
| 210 | 6  | 0 | 7.741  | 0     | Neg. p= 0     |
| 211 | 8  | 2 | 10.026 | 0.908 | Neg. p= 0.001 |
| 212 | 7  | 0 | 7      | 0     | Neg. p= 0     |
| 213 | 4  | 0 | 5.77   | 0     | Neg. p= 0.012 |
| 214 | 17 | 0 | 16.625 | 0     | Neg. p= 0     |
| 215 | 7  | 0 | 8.382  | 0     | Neg. p= 0     |

|     |    |   |        |       |               |
|-----|----|---|--------|-------|---------------|
| 216 | 8  | 4 | 8.196  | 1.976 | Neg. p= 0.016 |
| 217 | 2  | 0 | 2.716  | 0     | Neg. p= 0.072 |
| 218 | 4  | 0 | 5.412  | 0     | Neg. p= 0.004 |
| 219 | 5  | 0 | 5      | 0     | Neg. p= 0.004 |
| 220 | 3  | 0 | 3.877  | 0     | Neg. p= 0.022 |
| 221 | 3  | 0 | 2.57   | 0     | Neg. p= 0.059 |
| 222 | 3  | 0 | 4.095  | 0     | Neg. p= 0.019 |
| 224 | 5  | 0 | 5      | 0     | Neg. p= 0.004 |
| 225 | 3  | 1 | 3.571  | 0.463 | Neg. p= 0.069 |
| 226 | 6  | 0 | 6      | 0     | Neg. p= 0.001 |
| 227 | 3  | 1 | 4.068  | 0.442 | Neg. p= 0.048 |
| 228 | 7  | 2 | 7      | 1     | Neg. p= 0.008 |
| 229 | 9  | 0 | 5.543  | 0     | Neg. p= 0.007 |
| 231 | 3  | 0 | 4.307  | 0     | Neg. p= 0.016 |
| 234 | 7  | 0 | 7      | 0     | Neg. p= 0     |
| 235 | 4  | 0 | 4      | 0     | Neg. p= 0.012 |
| 236 | 3  | 0 | 3      | 0     | Neg. p= 0.037 |
| 237 | 5  | 1 | 5.025  | 0.51  | Neg. p= 0.019 |
| 238 | 6  | 1 | 7.707  | 0.45  | Neg. p= 0.002 |
| 239 | 8  | 1 | 9.376  | 0.466 | Neg. p= 0     |
| 240 | 11 | 4 | 13.592 | 1.826 | Neg. p= 0     |
| 241 | 3  | 1 | 3.89   | 0.449 | Neg. p= 0.055 |
| 243 | 5  | 0 | 5      | 0     | Neg. p= 0.004 |
| 244 | 10 | 6 | 11.929 | 2.776 | Neg. p= 0.004 |
| 245 | 11 | 0 | 7.148  | 0     | Neg. p= 0.001 |
| 247 | 4  | 0 | 5.339  | 0     | Neg. p= 0.004 |
| 250 | 2  | 0 | 2.721  | 0     | Neg. p= 0.06  |
| 251 | 11 | 3 | 12.725 | 2.301 | Neg. p= 0.004 |
| 252 | 7  | 1 | 7      | 0.5   | Neg. p= 0.003 |

|     |     |     |        |       |               |
|-----|-----|-----|--------|-------|---------------|
| 253 | 3   | 0   | 3      | 0     | Neg. p= 0.037 |
| 255 | 6   | 1   | 4.649  | 0.745 | Neg. p= 0.056 |
| 256 | 4   | 2   | 7.085  | 1.296 | Neg. p= 0.048 |
| 259 | 5.5 | 1.5 | 7.629  | 1.037 | Neg. p= 0.026 |
| 260 | 5   | 0   | 8.004  | 0     | Neg. p= 0.012 |
| 263 | 2   | 0   | 3.752  | 0     | Neg. p= 0.06  |
| 266 | 6   | 0   | 10.515 | 0     | Neg. p= 0     |
| 267 | 5   | 2   | 6.92   | 1.384 | Neg. p= 0.045 |
| 269 | 3   | 0   | 5.848  | 0     | Neg. p= 0.014 |
| 270 | 4   | 0   | 7.165  | 0     | Neg. p= 0.004 |
| 272 | 5   | 0   | 9.114  | 0     | Neg. p= 0.001 |
| 274 | 3   | 0   | 4.152  | 0     | Neg. p= 0.038 |
| 275 | 5   | 0   | 9.03   | 0     | Neg. p= 0.006 |
| 276 | 5   | 0   | 4.42   | 0     | Neg. p= 0.053 |
| 278 | 4   | 0   | 6.868  | 0     | Neg. p= 0.005 |
| 281 | 4   | 0   | 6.507  | 0     | Neg. p= 0.009 |
| 282 | 6   | 0   | 9.737  | 0     | Neg. p= 0.001 |
| 285 | 4   | 1   | 5.818  | 0.676 | Neg. p= 0.038 |
| 286 | 5   | 0   | 6.92   | 0     | Neg. p= 0.004 |
| 287 | 3   | 0   | 4.152  | 0     | Neg. p= 0.037 |
| 288 | 5   | 0   | 6.92   | 0     | Neg. p= 0.004 |
| 289 | 2   | 0   | 3.498  | 0     | Neg. p= 0.08  |
| 290 | 3   | 0   | 4.152  | 0     | Neg. p= 0.037 |
| 291 | 3   | 0   | 5.607  | 0     | Neg. p= 0.015 |
| 292 | 2   | 0   | 3.752  | 0     | Neg. p= 0.06  |
| 293 | 6   | 2   | 8.304  | 1.386 | Neg. p= 0.02  |
| 294 | 7   | 0   | 11.536 | 0     | Neg. p= 0     |
| 295 | 2   | 0   | 3.531  | 0     | Neg. p= 0.079 |
| 296 | 3   | 0   | 5.928  | 0     | Neg. p= 0.013 |

|     |   |   |        |       |               |
|-----|---|---|--------|-------|---------------|
| 297 | 8 | 1 | 11.396 | 0.682 | Neg. p= 0.001 |
| 299 | 3 | 0 | 5.687  | 0     | Neg. p= 0.016 |
| 304 | 5 | 0 | 7.096  | 0     | Neg. p= 0.004 |
| 305 | 5 | 0 | 7.096  | 0     | Neg. p= 0.004 |
| 307 | 5 | 1 | 7.158  | 0.709 | Neg. p= 0.017 |
| 308 | 3 | 0 | 5.655  | 0     | Neg. p= 0.045 |
| 309 | 6 | 0 | 11.17  | 0     | Neg. p= 0     |
| 310 | 3 | 0 | 4.258  | 0     | Neg. p= 0.037 |
| 312 | 2 | 0 | 3.557  | 0     | Neg. p= 0.086 |
| 313 | 8 | 3 | 8.284  | 2.636 | Neg. p= 0.069 |
| 314 | 6 | 0 | 10.175 | 0     | Neg. p= 0     |
| 318 | 6 | 0 | 8.66   | 0     | Neg. p= 0.001 |
| 319 | 6 | 0 | 8.66   | 0     | Neg. p= 0.001 |
| 323 | 3 | 0 | 6.118  | 0     | Neg. p= 0.038 |
| 326 | 3 | 0 | 5.863  | 0     | Neg. p= 0.02  |
| 328 | 6 | 1 | 7.567  | 0.826 | Neg. p= 0.018 |
| 329 | 3 | 0 | 4.33   | 0     | Neg. p= 0.037 |
| 330 | 7 | 0 | 7.477  | 0     | Neg. p= 0.005 |
| 331 | 2 | 0 | 3.911  | 0     | Neg. p= 0.061 |
| 333 | 6 | 0 | 6.65   | 0     | Neg. p= 0.009 |
| 334 | 2 | 0 | 3.91   | 0     | Neg. p= 0.061 |
| 335 | 3 | 0 | 4.33   | 0     | Neg. p= 0.037 |
| 336 | 4 | 0 | 5.773  | 0     | Neg. p= 0.012 |
| 338 | 5 | 0 | 9.763  | 0     | Neg. p= 0.001 |
| 339 | 4 | 0 | 5.773  | 0     | Neg. p= 0.014 |
| 340 | 5 | 0 | 7.217  | 0     | Neg. p= 0.004 |
| 342 | 2 | 0 | 3.872  | 0     | Neg. p= 0.071 |
| 344 | 5 | 0 | 7.217  | 0     | Neg. p= 0.005 |
| 345 | 3 | 0 | 5.559  | 0     | Neg. p= 0.018 |

|     |     |     |        |       |               |
|-----|-----|-----|--------|-------|---------------|
| 349 | 3   | 0   | 5.725  | 0     | Neg. p= 0.021 |
| 351 | 5   | 0   | 7.921  | 0     | Neg. p= 0.003 |
| 352 | 4   | 0   | 5.773  | 0     | Neg. p= 0.012 |
| 353 | 3   | 0   | 4.33   | 0     | Neg. p= 0.037 |
| 354 | 3   | 0   | 5.358  | 0     | Neg. p= 0.02  |
| 355 | 5.5 | 2.5 | 8.075  | 1.818 | Neg. p= 0.052 |
| 358 | 4   | 0   | 6.855  | 0     | Neg. p= 0.006 |
| 365 | 4   | 1   | 5.773  | 0.722 | Neg. p= 0.045 |
| 370 | 3   | 0   | 4.33   | 0     | Neg. p= 0.037 |
| 371 | 2   | 0   | 3.921  | 0     | Neg. p= 0.06  |
| 375 | 6   | 1   | 11.064 | 1.03  | Neg. p= 0.01  |
| 376 | 3   | 0   | 4.33   | 0     | Neg. p= 0.037 |
| 377 | 5   | 0   | 4.377  | 0     | Neg. p= 0.063 |
| 379 | 2   | 0   | 3.295  | 0     | Neg. p= 0.085 |
| 382 | 4   | 0   | 5.773  | 0     | Neg. p= 0.012 |
| 385 | 3   | 0   | 6.236  | 0     | Neg. p= 0.013 |
| 386 | 2   | 0   | 3.915  | 0     | Neg. p= 0.06  |
| 387 | 4   | 0   | 7.529  | 0     | Neg. p= 0.004 |
| 392 | 7   | 0   | 6.876  | 0     | Neg. p= 0.012 |
| 393 | 8   | 0   | 7.524  | 0     | Neg. p= 0.006 |
| 395 | 3   | 0   | 4.33   | 0     | Neg. p= 0.037 |
| 396 | 5   | 0   | 7.217  | 0     | Neg. p= 0.004 |

Supplementary Table S5: Codon-wise selection pressure shown for VP6 UP-SB21 gene of RCV virus from sloth bear and other hosts

| Codon | S* | N  | dS    | dN    | Selection detected |
|-------|----|----|-------|-------|--------------------|
| 1     | 8  | 0  | 8.07  | 0     | Neg. p= 0          |
| 2     | 0  | 13 | 0     | 6.041 | Pos. p= 0.015      |
| 9     | 2  | 0  | 2.548 | 0     | Neg. p= 0.068      |
| 10    | 15 | 0  | 15    | 0     | Neg. p= 0          |

|    |    |    |        |        |               |
|----|----|----|--------|--------|---------------|
| 12 | 0  | 13 | 0      | 6.03   | Pos. p= 0.014 |
| 18 | 1  | 14 | 1.046  | 6.851  | Pos. p= 0.025 |
| 26 | 0  | 8  | 0      | 6.694  | Pos. p= 0.001 |
| 30 | 0  | 7  | 0      | 3.396  | Pos. p= 0.076 |
| 32 | 0  | 13 | 0      | 6.439  | Pos. p= 0.015 |
| 33 | 0  | 9  | 0      | 7.123  | Pos. p= 0.004 |
| 35 | 8  | 10 | 10.169 | 4.557  | Neg. p= 0.075 |
| 36 | 0  | 5  | 0      | 3.765  | Pos. p= 0.025 |
| 40 | 0  | 18 | 0      | 8.814  | Pos. p= 0.001 |
| 41 | 0  | 15 | 0      | 5.939  | Pos. p= 0.076 |
| 42 | 0  | 19 | 0      | 9.048  | Pos. p= 0.001 |
| 45 | 0  | 4  | 0      | 3.616  | Pos. p= 0.019 |
| 49 | 0  | 11 | 0      | 5.29   | Pos. p= 0.018 |
| 50 | 0  | 18 | 0      | 8.616  | Pos. p= 0.001 |
| 52 | 0  | 13 | 0      | 6.381  | Pos. p= 0.017 |
| 54 | 0  | 10 | 0      | 4.5    | Pos. p= 0.05  |
| 56 | 0  | 19 | 0      | 9.542  | Pos. p= 0     |
| 57 | 0  | 9  | 0      | 4.331  | Pos. p= 0.037 |
| 59 | 2  | 17 | 2.198  | 8.35   | Pos. p= 0.039 |
| 60 | 0  | 7  | 0      | 3.383  | Pos. p= 0.074 |
| 61 | 15 | 11 | 18.371 | 5.038  | Neg. p= 0.001 |
| 62 | 0  | 9  | 0      | 4.448  | Pos. p= 0.029 |
| 63 | 0  | 11 | 0      | 8.331  | Pos. p= 0.005 |
| 64 | 9  | 3  | 9.117  | 1.49   | Neg. p= 0.003 |
| 69 | 0  | 6  | 0      | 2.94   | Pos. p= 0.099 |
| 71 | 0  | 8  | 0      | 3.857  | Pos. p= 0.053 |
| 72 | 0  | 7  | 0      | 3.604  | Pos. p= 0.07  |
| 74 | 0  | 16 | 0      | 13.207 | Pos. p= 0     |
| 75 | 5  | 4  | 6.226  | 1.873  | Neg. p= 0.069 |

|     |    |    |        |        |               |
|-----|----|----|--------|--------|---------------|
| 78  | 14 | 7  | 14.795 | 3.408  | Neg. p= 0.001 |
| 79  | 0  | 11 | 0      | 5.261  | Pos. p= 0.019 |
| 80  | 0  | 9  | 0      | 4.101  | Pos. p= 0.06  |
| 81  | 1  | 9  | 0.733  | 6.293  | Pos. p= 0.013 |
| 82  | 0  | 10 | 0      | 5.176  | Pos. p= 0.02  |
| 83  | 0  | 11 | 0      | 9.408  | Pos. p= 0     |
| 84  | 0  | 12 | 0      | 5.947  | Pos. p= 0.021 |
| 90  | 0  | 6  | 0      | 3.202  | Pos. p= 0.089 |
| 91  | 0  | 14 | 0      | 6.488  | Pos. p= 0.01  |
| 100 | 0  | 13 | 0      | 6.407  | Pos. p= 0.006 |
| 103 | 10 | 7  | 11.706 | 3.292  | Neg. p= 0.009 |
| 104 | 0  | 10 | 0      | 4.909  | Pos. p= 0.021 |
| 107 | 0  | 13 | 0      | 5.807  | Pos. p= 0.022 |
| 108 | 0  | 8  | 0      | 6.083  | Pos. p= 0.003 |
| 109 | 0  | 15 | 0      | 7.235  | Pos. p= 0.01  |
| 110 | 0  | 13 | 0      | 10.576 | Pos. p= 0     |
| 111 | 0  | 12 | 0      | 5.911  | Pos. p= 0.009 |
| 113 | 0  | 16 | 0      | 6.835  | Pos. p= 0.019 |
| 114 | 0  | 10 | 0      | 4.995  | Pos. p= 0.018 |
| 117 | 0  | 8  | 0      | 6.918  | Pos. p= 0.001 |
| 121 | 0  | 10 | 0      | 4.793  | Pos. p= 0.026 |
| 124 | 0  | 5  | 0      | 3.751  | Pos. p= 0.074 |
| 125 | 0  | 12 | 0      | 5.82   | Pos. p= 0.011 |
| 126 | 0  | 12 | 0      | 5.998  | Pos. p= 0.008 |
| 129 | 1  | 7  | 0.969  | 5.985  | Pos. p= 0.051 |
| 130 | 0  | 12 | 0      | 5.513  | Pos. p= 0.024 |
| 132 | 0  | 14 | 0      | 6.25   | Pos. p= 0.017 |
| 133 | 0  | 16 | 0      | 7.116  | Pos. p= 0.01  |
| 134 | 0  | 14 | 0      | 6.653  | Pos. p= 0.016 |

|     |     |      |        |        |               |
|-----|-----|------|--------|--------|---------------|
| 135 | 0   | 6    | 0      | 2.985  | Pos. p= 0.09  |
| 136 | 0   | 8    | 0      | 6.026  | Pos. p= 0.016 |
| 137 | 0   | 16   | 0      | 7.876  | Pos. p= 0.005 |
| 138 | 0   | 3    | 0      | 2.662  | Pos. p= 0.065 |
| 141 | 0   | 10   | 0      | 4.592  | Pos. p= 0.052 |
| 143 | 0   | 8    | 0      | 3.627  | Pos. p= 0.085 |
| 144 | 0   | 12   | 0      | 4.93   | Pos. p= 0.081 |
| 146 | 0   | 13   | 0      | 6.369  | Pos. p= 0.008 |
| 147 | 0   | 13   | 0      | 6.238  | Pos. p= 0.009 |
| 148 | 0   | 18   | 0      | 8.992  | Pos. p= 0.001 |
| 150 | 0.5 | 14.5 | 0.569  | 6.836  | Pos. p= 0.023 |
| 151 | 0   | 13   | 0      | 6.256  | Pos. p= 0.008 |
| 153 | 0   | 21   | 0      | 12.483 | Pos. p= 0     |
| 157 | 9   | 10   | 10.608 | 4.657  | Neg. p= 0.061 |
| 163 | 0   | 12   | 0      | 6.001  | Pos. p= 0.008 |
| 165 | 0   | 20   | 0      | 9.341  | Pos. p= 0.001 |
| 166 | 0   | 6    | 0      | 3      | Pos. p= 0.088 |
| 168 | 0   | 7    | 0      | 5.702  | Pos. p= 0.003 |
| 169 | 0   | 5    | 0      | 4.115  | Pos. p= 0.058 |
| 170 | 0   | 9    | 0      | 4.311  | Pos. p= 0.038 |
| 171 | 0   | 11   | 0      | 9.268  | Pos. p= 0     |
| 173 | 0   | 9    | 0      | 6.362  | Pos. p= 0.012 |
| 178 | 0   | 11   | 0      | 5.332  | Pos. p= 0.016 |
| 179 | 1   | 21   | 0.986  | 14.828 | Pos. p= 0     |
| 182 | 0   | 14   | 0      | 6.955  | Pos. p= 0.004 |
| 183 | 0   | 15   | 0      | 7.186  | Pos. p= 0.005 |
| 184 | 0   | 21   | 0      | 10.328 | Pos. p= 0     |
| 185 | 1   | 10   | 0.879  | 5.78   | Pos. p= 0.032 |
| 186 | 0   | 11   | 0      | 5.001  | Pos. p= 0.033 |

|     |    |    |        |        |               |
|-----|----|----|--------|--------|---------------|
| 189 | 0  | 10 | 0      | 4.591  | Pos. p= 0.048 |
| 191 | 0  | 10 | 0      | 4.867  | Pos. p= 0.048 |
| 193 | 0  | 10 | 0      | 7.122  | Pos. p= 0.013 |
| 194 | 0  | 11 | 0      | 5.021  | Pos. p= 0.035 |
| 195 | 0  | 7  | 0      | 6.189  | Pos. p= 0.001 |
| 199 | 0  | 12 | 0      | 6.341  | Pos. p= 0.008 |
| 200 | 0  | 7  | 0      | 6.248  | Pos. p= 0.001 |
| 201 | 0  | 10 | 0      | 5      | Pos. p= 0.017 |
| 202 | 0  | 8  | 0      | 3.999  | Pos. p= 0.039 |
| 205 | 0  | 20 | 0      | 8.565  | Pos. p= 0.007 |
| 207 | 4  | 10 | 3.067  | 7.974  | Pos. p= 0.078 |
| 208 | 10 | 11 | 11.913 | 5.109  | Neg. p= 0.044 |
| 209 | 0  | 10 | 0      | 4.998  | Pos. p= 0.023 |
| 210 | 0  | 4  | 0      | 3.637  | Pos. p= 0.02  |
| 211 | 0  | 8  | 0      | 3.981  | Pos. p= 0.041 |
| 213 | 1  | 10 | 1.014  | 4.965  | Pos. p= 0.08  |
| 214 | 0  | 10 | 0      | 4.88   | Pos. p= 0.044 |
| 216 | 5  | 1  | 5      | 0.5    | Neg. p= 0.018 |
| 217 | 0  | 12 | 0      | 5.908  | Pos. p= 0.022 |
| 218 | 0  | 15 | 0      | 8.664  | Pos. p= 0.001 |
| 220 | 1  | 7  | 1.012  | 5.803  | Pos. p= 0.063 |
| 221 | 0  | 18 | 0      | 8.973  | Pos. p= 0.001 |
| 225 | 0  | 12 | 0      | 5.667  | Pos. p= 0.015 |
| 226 | 1  | 14 | 0.726  | 9.906  | Pos. p= 0.001 |
| 227 | 0  | 21 | 0      | 15.667 | Pos. p= 0     |
| 228 | 0  | 9  | 0      | 4.018  | Pos. p= 0.072 |
| 229 | 0  | 11 | 0      | 4.975  | Pos. p= 0.035 |
| 230 | 0  | 13 | 0      | 5.218  | Pos. p= 0.091 |
| 233 | 0  | 13 | 0      | 6.456  | Pos. p= 0.006 |

|     |    |    |        |        |               |
|-----|----|----|--------|--------|---------------|
| 234 | 11 | 11 | 13.664 | 5.011  | Neg. p= 0.017 |
| 237 | 0  | 21 | 0      | 9.107  | Pos. p= 0.004 |
| 239 | 3  | 1  | 3.42   | 0.485  | Neg. p= 0.083 |
| 240 | 0  | 9  | 0      | 7.031  | Pos. p= 0     |
| 242 | 0  | 14 | 0      | 6.422  | Pos. p= 0.011 |
| 243 | 0  | 5  | 0      | 4.336  | Pos. p= 0.012 |
| 245 | 0  | 11 | 0      | 5.106  | Pos. p= 0.026 |
| 250 | 0  | 6  | 0      | 4.904  | Pos. p= 0.033 |
| 251 | 0  | 10 | 0      | 8.198  | Pos. p= 0     |
| 252 | 0  | 8  | 0      | 3.956  | Pos. p= 0.043 |
| 253 | 0  | 8  | 0      | 3.572  | Pos. p= 0.097 |
| 255 | 0  | 12 | 0      | 5.806  | Pos. p= 0.012 |
| 256 | 0  | 13 | 0      | 6.392  | Pos. p= 0.013 |
| 258 | 0  | 19 | 0      | 8.986  | Pos. p= 0.003 |
| 259 | 0  | 10 | 0      | 4.815  | Pos. p= 0.025 |
| 260 | 1  | 11 | 1.044  | 5.662  | Pos. p= 0.056 |
| 261 | 0  | 8  | 0      | 4.332  | Pos. p= 0.035 |
| 263 | 0  | 10 | 0      | 4.902  | Pos. p= 0.021 |
| 264 | 0  | 13 | 0      | 6.27   | Pos. p= 0.008 |
| 267 | 0  | 9  | 0      | 4.466  | Pos. p= 0.028 |
| 268 | 0  | 9  | 0      | 4.759  | Pos. p= 0.026 |
| 269 | 1  | 6  | 0.539  | 5.319  | Pos. p= 0.014 |
| 270 | 0  | 10 | 0      | 4.515  | Pos. p= 0.048 |
| 274 | 8  | 3  | 9.641  | 1.486  | Neg. p= 0.003 |
| 276 | 2  | 7  | 1.191  | 5.801  | Pos. p= 0.033 |
| 277 | 1  | 11 | 1.064  | 8.064  | Pos. p= 0.017 |
| 278 | 0  | 8  | 0      | 6.761  | Pos. p= 0.009 |
| 279 | 0  | 9  | 0      | 4.018  | Pos. p= 0.072 |
| 280 | 0  | 23 | 0      | 16.553 | Pos. p= 0     |

|     |    |    |        |        |               |
|-----|----|----|--------|--------|---------------|
| 282 | 0  | 6  | 0      | 3      | Pos. p= 0.088 |
| 283 | 0  | 7  | 0      | 3.434  | Pos. p= 0.067 |
| 287 | 0  | 13 | 0      | 6.281  | Pos. p= 0.008 |
| 288 | 1  | 11 | 1.035  | 5.408  | Pos. p= 0.063 |
| 289 | 0  | 8  | 0      | 5.958  | Pos. p= 0.029 |
| 290 | 0  | 11 | 0      | 8.05   | Pos. p= 0.003 |
| 292 | 1  | 9  | 0.734  | 6.478  | Pos. p= 0.012 |
| 294 | 0  | 8  | 0      | 3.981  | Pos. p= 0.046 |
| 295 | 0  | 14 | 0      | 6.895  | Pos. p= 0.004 |
| 297 | 0  | 9  | 0      | 7.368  | Pos. p= 0.002 |
| 300 | 0  | 9  | 0      | 7.858  | Pos. p= 0     |
| 302 | 0  | 14 | 0      | 11.315 | Pos. p= 0     |
| 303 | 0  | 8  | 0      | 3.713  | Pos. p= 0.087 |
| 304 | 0  | 9  | 0      | 4.372  | Pos. p= 0.034 |
| 305 | 0  | 8  | 0      | 3.83   | Pos. p= 0.055 |
| 307 | 0  | 14 | 0      | 6.526  | Pos. p= 0.009 |
| 312 | 0  | 15 | 0      | 7.288  | Pos. p= 0.01  |
| 313 | 12 | 9  | 12.726 | 4.375  | Neg. p= 0.013 |
| 314 | 0  | 14 | 0      | 6.901  | Pos. p= 0.011 |
| 318 | 0  | 9  | 0      | 7.51   | Pos. p= 0.001 |
| 320 | 0  | 8  | 0      | 4.237  | Pos. p= 0.039 |
| 321 | 0  | 9  | 0      | 4.793  | Pos. p= 0.026 |
| 323 | 12 | 5  | 12.374 | 2.463  | Neg. p= 0.001 |
| 326 | 10 | 11 | 11.487 | 5.384  | Neg. p= 0.066 |
| 329 | 0  | 11 | 0      | 6.249  | Pos. p= 0.003 |
| 335 | 3  | 17 | 3      | 8.5    | Pos. p= 0.06  |
| 339 | 2  | 17 | 2.06   | 8.387  | Pos. p= 0.029 |
| 345 | 0  | 8  | 0      | 3.998  | Pos. p= 0.05  |
| 346 | 2  | 15 | 2.169  | 7.282  | Pos. p= 0.067 |

|     |   |   |       |       |               |
|-----|---|---|-------|-------|---------------|
| 356 | 5 | 1 | 5.026 | 0.499 | Neg. p= 0.017 |
|-----|---|---|-------|-------|---------------|

\* N = non-synonymous and S= synonymous substitutions; dN and dS =their respective rates

Supplementary Table S6: BLAST results of VP7 UP-SB37 gene from sloth bear with accession ID, host, country and strain details along with sequence identity and query coverage

| S. No. | Accession ID, Host, Country, Strain | % coverage | % identity |
|--------|-------------------------------------|------------|------------|
| 1.     | KX442661.1,Sloth-bear,IND,UP-SB37   | 100%       | 100.00%    |
| 2.     | AB905210.1,Pig,CJ10-1               | 97%        | 88.40%     |
| 3.     | LC122610.1,Pig,Tottori-KT01         | 97%        | 87.14%     |
| 4.     | KJ814499.1,Pig,KOR,09-15-7          | 96%        | 86.66%     |
| 5.     | EF464655.1,Pig,134,04-2             | 96%        | 86.47%     |
| 6.     | AB905223.1,Pig,87-I4                | 97%        | 86.16%     |
| 7.     | KJ814497.1,Pig,KOR,07-60-4          | 96%        | 86.00%     |
| 8.     | AB905213.1,Pig,CJ27-1               | 97%        | 85.97%     |
| 9.     | AB905229.1,Pig,105-4                | 97%        | 85.97%     |
| 10.    | MN809638.1,Pig,RV0143               | 97%        | 85.96%     |
| 11.    | AB905222.1,Pig,87-G2                | 97%        | 85.69%     |
| 12.    | EF464657.1,Pig,43,06-22             | 96%        | 85.62%     |
| 13.    | EF464656.1,Pig,43,06-16             | 96%        | 85.62%     |
| 14.    | KJ814500.1,Pig,KOR,61-12            | 96%        | 85.61%     |
| 15.    | LC122600.1,Pig,Tochigi-2            | 97%        | 85.57%     |
| 16.    | AB905219.1,Pig,86-H3                | 97%        | 85.53%     |
| 17.    | AB905215.1,Pig,CJ32-3               | 97%        | 85.50%     |
| 18.    | AB905220.1,Pig,86-H5                | 97%        | 85.43%     |
| 19.    | KJ814498.1,Pig,KOR,07-109-12        | 96%        | 85.32%     |
| 20.    | KJ814496.1,Pig,KOR,06-281-4         | 96%        | 85.23%     |
| 21.    | KJ814495.1,Pig,KOR,06-176-1         | 96%        | 85.23%     |
| 22.    | EF464654.1,Pig,344-04-7             | 96%        | 84.86%     |
| 23.    | KM099270.1,Pig,CZE,P44              | 96%        | 84.81%     |

|     |                                   |     |        |
|-----|-----------------------------------|-----|--------|
| 24. | AB905230.1,Pig,134-9              | 97% | 83.66% |
| 25. | AB905209.1,Pig,CJ3-6              | 97% | 83.30% |
| 26. | KX353813.1,Sloth-bear,IND,UP-SB19 | 96% | 79.98% |
| 27. | KX825945.1,Pig,IND,NAG-995        | 96% | 79.04% |
| 28. | LC122621.1,Pig,Ishi-1             | 97% | 79.00% |
| 29. | KJ814506.1,Pig,KOR,11-58-4        | 96% | 78.40% |
| 30. | KJ814508.1,Pig,KOR,1027           | 96% | 78.31% |
| 31. | KJ814503.1,Pig,KOR,06-69-1        | 96% | 78.14% |
| 32. | KJ814507.1,Pig,KOR,11-58-7,2011   | 96% | 78.12% |
| 33. | M61101.1,Pig,UK,Cowden            | 97% | 78.06% |
| 34. | KJ814502.1,Pig,KOR,06-52-2        | 96% | 78.05% |
| 35. | AF225554.1,Human,T97,190          | 97% | 77.98% |
| 36. | KP735970.1,Human,RUS,Omsk08-437   | 97% | 77.94% |
| 37. | AF225555.1,Human,T97,194          | 97% | 77.94% |
| 38. | X77258.1,Human,UK,Preston         | 97% | 77.90% |
| 39. | AM118023.1,Human,BCN21            | 97% | 77.89% |
| 40. | AF225552.1,Human,T97,126          | 97% | 77.88% |
| 41. | KJ814505.1,Pig,KOR,09-84-5        | 96% | 77.85% |
| 42. | KT284784.1,Human,CAU14-1-242      | 97% | 77.83% |
| 43. | JQ177070.2,Human,RUS,Nsk08-3414   | 97% | 77.83% |
| 44. | KP735974.1,Human,RUS,Nsk09-B11    | 97% | 77.83% |
| 45. | JN934901.1,Human,RUS,Nsk09-B43    | 97% | 77.83% |
| 46. | U20989.1,Human,BF                 | 97% | 77.81% |
| 47. | MZ516919.1,Human,USA,BUDS0068     | 97% | 77.81% |
| 48. | AF225561.1,Human,KA4,949          | 97% | 77.79% |
| 49. | AF225558.1,Human,T97,330          | 97% | 77.79% |

Supplementary Table S7: Codon-wise selection pressure shown for VP7 gene of RCV virus from sloth bear (UP-SB37 and UP-SB19) and other hosts

| Codon | Partition | S | N  | dS    | dN    | Selection detected |
|-------|-----------|---|----|-------|-------|--------------------|
| 17    | 1         | 0 | 8  | 0     | 3.794 | Pos. p= 0.059      |
| 23    | 1         | 0 | 13 | 0     | 5.68  | Pos. p= 0.03       |
| 27    | 1         | 0 | 8  | 0     | 3.995 | Pos. p= 0.039      |
| 29    | 1         | 0 | 9  | 0     | 4.072 | Pos. p= 0.076      |
| 32    | 1         | 0 | 10 | 0     | 4.914 | Pos. p= 0.021      |
| 33    | 1         | 0 | 15 | 0     | 7.405 | Pos. p= 0.003      |
| 34    | 1         | 0 | 8  | 0     | 3.866 | Pos. p= 0.051      |
| 42    | 1         | 1 | 12 | 1.096 | 5.962 | Pos. p= 0.053      |
| 45    | 1         | 0 | 8  | 0     | 3.861 | Pos. p= 0.094      |
| 46    | 1         | 1 | 18 | 1.121 | 8.658 | Pos. p= 0.01       |
| 47    | 1         | 0 | 9  | 0     | 4.049 | Pos. p= 0.082      |
| 48    | 1         | 0 | 14 | 0     | 6.788 | Pos. p= 0.015      |
| 53    | 1         | 1 | 14 | 1.039 | 6.876 | Pos. p= 0.024      |
| 54    | 1         | 0 | 10 | 0     | 6.157 | Pos. p= 0.034      |
| 56    | 1         | 0 | 10 | 0     | 4.89  | Pos. p= 0.022      |
| 63    | 1         | 0 | 9  | 0     | 4.445 | Pos. p= 0.067      |
| 66    | 1         | 0 | 15 | 0     | 6.583 | Pos. p= 0.017      |
| 68    | 1         | 0 | 8  | 0     | 3.818 | Pos. p= 0.062      |
| 72    | 1         | 0 | 6  | 0     | 2.972 | Pos. p= 0.093      |
| 73    | 1         | 0 | 8  | 0     | 3.825 | Pos. p= 0.056      |
| 79    | 1         | 0 | 7  | 0     | 3.476 | Pos. p= 0.073      |
| 86    | 1         | 0 | 6  | 0     | 2.999 | Pos. p= 0.088      |
| 89    | 1         | 0 | 16 | 0     | 7.844 | Pos. p= 0.002      |
| 90    | 1         | 6 | 0  | 3.989 | 0     | Neg. p= 0.026      |
| 91    | 1         | 0 | 7  | 0     | 3.469 | Pos. p= 0.077      |
| 94    | 1         | 0 | 13 | 0     | 6.329 | Pos. p= 0.009      |

|     |   |   |    |       |       |               |
|-----|---|---|----|-------|-------|---------------|
| 95  | 1 | 0 | 9  | 0     | 4.354 | Pos. p= 0.039 |
| 96  | 1 | 0 | 12 | 0     | 5.637 | Pos. p= 0.016 |
| 97  | 1 | 0 | 8  | 0     | 3.751 | Pos. p= 0.065 |
| 101 | 1 | 0 | 8  | 0     | 3.906 | Pos. p= 0.047 |
| 108 | 1 | 0 | 11 | 0     | 5.247 | Pos. p= 0.019 |
| 113 | 1 | 0 | 7  | 0     | 3.353 | Pos. p= 0.08  |
| 117 | 1 | 3 | 1  | 4.16  | 0.485 | Neg. p= 0.056 |
| 125 | 1 | 0 | 9  | 0     | 4.079 | Pos. p= 0.071 |
| 128 | 1 | 0 | 11 | 0     | 5.066 | Pos. p= 0.045 |
| 133 | 1 | 0 | 10 | 0     | 4.582 | Pos. p= 0.061 |
| 139 | 1 | 0 | 9  | 0     | 4.26  | Pos. p= 0.043 |
| 142 | 1 | 4 | 2  | 4.111 | 0.995 | Neg. p= 0.093 |
| 148 | 1 | 0 | 10 | 0     | 4.515 | Pos. p= 0.063 |
| 154 | 1 | 0 | 9  | 0     | 4.194 | Pos. p= 0.049 |
| 157 | 1 | 0 | 7  | 0     | 3.371 | Pos. p= 0.084 |
| 161 | 1 | 0 | 11 | 0     | 5.325 | Pos. p= 0.039 |
| 165 | 1 | 0 | 8  | 0     | 4     | Pos. p= 0.039 |
| 166 | 1 | 0 | 7  | 0     | 3.413 | Pos. p= 0.07  |
| 169 | 1 | 0 | 10 | 0     | 4.776 | Pos. p= 0.031 |
| 181 | 1 | 0 | 8  | 0     | 3.819 | Pos. p= 0.056 |
| 182 | 1 | 0 | 10 | 0     | 4.901 | Pos. p= 0.022 |
| 185 | 1 | 0 | 8  | 0     | 4.208 | Pos. p= 0.034 |
| 186 | 1 | 1 | 10 | 1.012 | 4.97  | Pos. p= 0.079 |
| 187 | 1 | 0 | 11 | 0     | 5.303 | Pos. p= 0.019 |
| 188 | 1 | 0 | 7  | 0     | 3.462 | Pos. p= 0.063 |
| 189 | 1 | 0 | 8  | 0     | 3.781 | Pos. p= 0.098 |
| 191 | 1 | 0 | 9  | 0     | 4.269 | Pos. p= 0.049 |
| 192 | 1 | 0 | 11 | 0     | 5.358 | Pos. p= 0.028 |
| 193 | 1 | 0 | 9  | 0     | 4.418 | Pos. p= 0.031 |

|     |   |     |      |       |       |               |
|-----|---|-----|------|-------|-------|---------------|
| 195 | 1 | 0   | 9    | 0     | 4.648 | Pos. p= 0.024 |
| 199 | 1 | 0   | 7    | 0     | 4.387 | Pos. p= 0.088 |
| 203 | 1 | 1.5 | 13.5 | 1.599 | 6.688 | Pos. p= 0.063 |
| 205 | 1 | 0   | 8    | 0     | 3.855 | Pos. p= 0.052 |
| 207 | 1 | 6   | 0    | 3.654 | 0     | Neg. p= 0.042 |
| 208 | 1 | 0   | 14   | 0     | 6.905 | Pos. p= 0.015 |
| 210 | 1 | 0   | 13   | 0     | 6.331 | Pos. p= 0.007 |
| 211 | 1 | 0   | 10   | 0     | 4.904 | Pos. p= 0.021 |
| 216 | 1 | 0   | 8    | 0     | 3.849 | Pos. p= 0.097 |
| 218 | 1 | 0   | 12   | 0     | 5.265 | Pos. p= 0.037 |
| 220 | 1 | 0   | 13   | 0     | 6.217 | Pos. p= 0.011 |
| 225 | 1 | 0   | 7    | 0     | 3.423 | Pos. p= 0.068 |
| 226 | 1 | 0   | 9    | 0     | 4.466 | Pos. p= 0.028 |
| 233 | 1 | 0   | 9    | 0     | 4.259 | Pos. p= 0.045 |
| 245 | 1 | 0   | 8    | 0     | 3.942 | Pos. p= 0.058 |
| 246 | 1 | 0   | 10   | 0     | 4.52  | Pos. p= 0.063 |
| 248 | 1 | 4   | 0    | 2.759 | 0     | Neg. p= 0.079 |
| 250 | 1 | 0   | 8    | 0     | 3.836 | Pos. p= 0.062 |
| 251 | 1 | 0   | 14   | 0     | 6.507 | Pos. p= 0.01  |
| 252 | 1 | 0   | 9    | 0     | 4.028 | Pos. p= 0.082 |
| 260 | 1 | 0   | 14   | 0     | 6.702 | Pos. p= 0.017 |
| 271 | 1 | 2   | 0    | 2.312 | 0     | Neg. p= 0.083 |
| 272 | 1 | 0   | 7    | 0     | 3.713 | Pos. p= 0.064 |
| 273 | 1 | 3   | 0    | 3.072 | 0     | Neg. p= 0.034 |

Supplementary Table S8: BLAST results of NSP4 gene from sloth bear with accession ID, host, country and strain details along with sequence identity and query coverage

| S.No. | Accession ID, Host, Country, Strain | % coverage | %identity |
|-------|-------------------------------------|------------|-----------|
| 1.    | KX442662.1,SB,IND,UP-SB37           | 100%       | 100.00%   |
| 2.    | KY783644.1,Pig,IND,Por-993          | 100%       | 98.95%    |

|     |                                      |      |        |
|-----|--------------------------------------|------|--------|
| 3.  | KY909976.1,Pig,CAN,A10-122           | 100% | 88.33% |
| 4.  | KY909975.1,Pig,CAN,A10-108           | 100% | 88.33% |
| 5.  | KY909972.1,Pig,CAN,A5-36             | 100% | 87.87% |
| 6.  | KY783647.1,Pig,IND,KL-224            | 100% | 87.21% |
| 7.  | KY909973.1,Pig,CAN,A8-158            | 100% | 87.11% |
| 8.  | AF093202.1,Pig,UAS,Cowden-virulent   | 100% | 86.46% |
| 9.  | MH282894.1,Pig,USA,OK.5.68           | 100% | 86.25% |
| 10. | KX373856.1,Pig,UEL-57                | 100% | 86.16% |
| 11. | MZ218321.1,Pig,366R-k141_226904      | 100% | 86.16% |
| 12. | LC622311.1,Pig,JPN,Ishi-Im1          | 100% | 85.95% |
| 13. | LC122608.1,Pig,Tochigi-2             | 100% | 85.80% |
| 14. | LC622333.1,Pig,JPN,Ishi-Ka6          | 100% | 85.74% |
| 15. | AF093203.1,Pig,USA,Cowden-attenuated | 100% | 85.83% |
| 16. | LC122630.1,Pig,Ishi-1                | 100% | 85.12% |
| 17. | LC122619.1,Pig,Tottori-KT01          | 100% | 85.12% |
| 18. | KX373857.1,Pig,UEL-77                | 100% | 84.91% |
| 19. | KX373863.1,Pig,UEL-1436              | 100% | 84.70% |
| 20. | KM099249.1,Pig,CZE,P9                | 99%  | 84.81% |
| 21. | KC164673.1,Pig,USA,RV0104            | 98%  | 84.96% |
| 22. | KX373855.1,Pig,UEL-33                | 100% | 84.49% |
| 23. | MN809642.1,Pig,RV0143                | 100% | 84.28% |
| 24. | LC622322.1,Pig,JPN,Ishi-Im9          | 100% | 84.38% |
| 25. | KY783643.1,Pig,IND,Por-103           | 100% | 84.10% |
| 26. | KY783645.1,Pig,IND,ASM-132           | 100% | 84.10% |
| 27. | KX373858.1,Pig,UEL-154               | 100% | 84.07% |
| 28. | KC164676.1,Pig,USA,RV0143            | 100% | 84.07% |
| 29. | KY783642.1,Pig,IND,Por-100           | 100% | 83.89% |
| 30. | KY783641.1,Pig,IND,Por-98            | 100% | 83.89% |
| 31. | KY783649.1,Pig,IND,UP-404            | 100% | 83.89% |

|     |                             |      |        |
|-----|-----------------------------|------|--------|
| 32. | KX373859.1,Pig,UEL-203      | 100% | 83.99% |
| 33. | LC622368.1,Pig,JPN,HgYa1    | 100% | 83.89% |
| 34. | KY783646.1,Pig,IND,ASM-140  | 100% | 83.68% |
| 35. | KM099248.1,Pig,CZE,P8       | 97%  | 84.12% |
| 36. | LC122598.1,Pig,Tochigi-1-1  | 100% | 83.44% |
| 37. | KX373861.1,Pig,UEL-576      | 100% | 83.37% |
| 38. | MN395882.1, Human,BRA,SD137 | 99%  | 83.12% |
| 39. | KM099250.1,Pig,CZE,P303     | 98%  | 83.37% |
| 40. | MN395899.1,Human,BRA,BP209  | 99%  | 82.91% |
| 41. | MN395900.1, Human,BRA,BP213 | 99%  | 82.91% |
| 42. | MN395883.1, Human,BRA,SD181 | 99%  | 82.91% |
| 43. | KX373860.1,Pig,UEL-369      | 100% | 82.81% |
| 44. | KY783648.1,Pig,IND,TRI-542  | 100% | 82.64% |
| 45. | KX373862.1,Pig,UEL-916      | 100% | 82.46% |
| 46. | OK491938.1,Pig,IND,NIV94306 | 95%  | 83.11% |
| 47. | OK491937.1,Pig,IND,NIV94294 | 95%  | 83.11% |
| 48. | OK491936.1,Pig,IND,NIV94319 | 95%  | 83.08% |
| 49. | OK491935.1,Pig,IND,NIV94285 | 95%  | 83.08% |
| 50. | OK491934.1,Pig,IND,NIV94292 | 95%  | 83.08% |
| 51. | OK491933.1,Pig,IND,NIV94291 | 95%  | 83.08% |
| 52. | OK491932.1,Pig,IND,NIV94289 | 95%  | 83.08% |
| 53. | LC622357.1,Pig,JPN,Ishi-Ya3 | 98%  | 82.59% |
| 54. | LC622346.1,Pig,JPN,Ishi-Ya1 | 98%  | 82.59% |
| 55. | KM099252.1,Pig,CZE,P44      | 100% | 82.19% |
| 56. | KM099251.1,Pig,CZE,P21      | 100% | 82.16% |
| 57. | KX373864.1,Pig,UEL-1515     | 100% | 81.84% |
| 58. | KM099253.1,Pig,CZE,P59      | 98%  | 81.97% |
| 59. | KY909979.1,Pig,CAN,N-A12-26 | 100% | 80.75% |

Supplementary Table S9: Codon-wise selection pressure shown for NSP4 gene of RCV virus from sloth bear (UP-SB37) and other hosts

| Codon | S*  | N   | dS     | dN    | Selection detected |
|-------|-----|-----|--------|-------|--------------------|
| 8     | 10  | 0   | 12.569 | 0     | Neg. p= 0          |
| 13    | 4   | 1   | 4.012  | 0.505 | Neg. p= 0.046      |
| 14    | 7   | 2   | 8.813  | 0.907 | Neg. p= 0.002      |
| 18    | 5.5 | 2.5 | 5.509  | 1.251 | Neg. p= 0.054      |
| 21    | 6   | 2   | 7.539  | 0.908 | Neg. p= 0.006      |
| 22    | 6   | 2   | 6.025  | 0.998 | Neg. p= 0.019      |
| 24    | 4   | 1   | 4      | 0.5   | Neg. p= 0.045      |
| 25    | 5   | 1   | 6.335  | 0.5   | Neg. p= 0.008      |
| 26    | 1   | 12  | 1.03   | 5.913 | Pos. p= 0.045      |
| 27    | 7   | 1   | 4.028  | 0.833 | Neg. p= 0.098      |
| 28    | 3   | 0   | 3      | 0     | Neg. p= 0.039      |
| 30    | 0   | 9   | 0      | 4.435 | Pos. p= 0.03       |
| 33    | 6   | 0   | 3.343  | 0     | Neg. p= 0.046      |
| 34    | 7   | 0   | 7      | 0     | Neg. p= 0          |
| 35    | 7   | 0   | 8.89   | 0     | Neg. p= 0          |
| 37    | 3   | 0   | 3      | 0     | Neg. p= 0.045      |
| 40    | 14  | 1   | 8.587  | 0.828 | Neg. p= 0.003      |
| 41    | 5   | 4   | 6.038  | 1.921 | Neg. p= 0.081      |
| 44    | 3   | 0   | 3.807  | 0     | Neg. p= 0.018      |
| 49    | 5   | 0   | 2.79   | 0     | Neg. p= 0.077      |
| 51    | 7   | 5   | 7.469  | 2.534 | Neg. p= 0.056      |
| 54    | 8   | 4   | 8.382  | 1.955 | Neg. p= 0.014      |
| 57    | 6   | 0   | 6      | 0     | Neg. p= 0.002      |
| 60    | 7.5 | 8.5 | 10.376 | 3.737 | Neg. p= 0.045      |
| 63    | 4   | 0   | 4.939  | 0     | Neg. p= 0.006      |
| 64    | 8   | 1   | 10.06  | 0.455 | Neg. p= 0          |
| 65    | 5   | 3   | 5.48   | 1.498 | Neg. p= 0.069      |

|     |        |       |        |       |               |
|-----|--------|-------|--------|-------|---------------|
| 67  | 6      | 0     | 7.271  | 0     | Neg. p= 0     |
| 68  | 6      | 6     | 7.582  | 2.717 | Neg. p= 0.069 |
| 69  | 6      | 6     | 7.57   | 2.718 | Neg. p= 0.069 |
| 76  | 5      | 2     | 6.349  | 0.904 | Neg. p= 0.016 |
| 78  | 5      | 0     | 6.35   | 0     | Neg. p= 0.001 |
| 79  | 6      | 2     | 7.285  | 0.956 | Neg. p= 0.008 |
| 80  | 8      | 0     | 9.695  | 0     | Neg. p= 0     |
| 82  | 4      | 0     | 4.94   | 0     | Neg. p= 0.006 |
| 86  | 5      | 3     | 5.941  | 1.46  | Neg. p= 0.051 |
| 87  | 6      | 0     | 7.364  | 0     | Neg. p= 0.003 |
| 90  | 8      | 0     | 9.613  | 0     | Neg. p= 0     |
| 94  | 3      | 0     | 3.812  | 0     | Neg. p= 0.018 |
| 96  | 5      | 0     | 5      | 0     | Neg. p= 0.004 |
| 98  | 11     | 0     | 6.817  | 0     | Neg. p= 0.002 |
| 99  | 3      | 0     | 3.802  | 0     | Neg. p= 0.018 |
| 101 | 7      | 6     | 8.853  | 2.716 | Neg. p= 0.032 |
| 105 | 6      | 0     | 7.6    | 0     | Neg. p= 0     |
| 106 | 7      | 0     | 8.834  | 0     | Neg. p= 0     |
| 110 | 10     | 1     | 10.43  | 0.502 | Neg. p= 0     |
| 113 | 6      | 0     | 7.318  | 0     | Neg. p= 0     |
| 114 | 8      | 1     | 8      | 0.551 | Neg. p= 0.002 |
| 115 | 5      | 2     | 5.497  | 0.957 | Neg. p= 0.03  |
| 116 | 9      | 1     | 8.944  | 0.509 | Neg. p= 0     |
| 117 | 2      | 0     | 2.177  | 0     | Neg. p= 0.099 |
| 118 | 4      | 3     | 4.916  | 1.408 | Neg. p= 0.097 |
| 120 | 12     | 0     | 13.777 | 0     | Neg. p= 0     |
| 125 | 10.167 | 9.833 | 13.334 | 4.431 | Neg. p= 0.014 |
| 126 | 6      | 2     | 7.601  | 0.905 | Neg. p= 0.006 |
| 131 | 7      | 7     | 8.14   | 3.348 | Neg. p= 0.081 |

|     |       |        |        |       |               |
|-----|-------|--------|--------|-------|---------------|
| 132 | 0.833 | 13.167 | 0.858  | 6.499 | Pos. p= 0.027 |
| 133 | 6     | 5      | 6.848  | 2.452 | Neg. p= 0.079 |
| 140 | 7     | 0      | 8.876  | 0     | Neg. p= 0     |
| 142 | 9     | 0      | 11.422 | 0     | Neg. p= 0     |
| 143 | 7     | 1      | 8.854  | 0.453 | Neg. p= 0.001 |
| 144 | 10    | 2      | 10.049 | 0.998 | Neg. p= 0.001 |
| 145 | 3     | 0      | 3      | 0     | Neg. p= 0.038 |
| 147 | 8     | 0      | 4.94   | 0     | Neg. p= 0.012 |
| 149 | 5     | 0      | 5      | 0     | Neg. p= 0.004 |
| 150 | 2     | 0      | 2.474  | 0     | Neg. p= 0.075 |

\* N = non-synonymous and S= synonymous substitutions; dN and dS =their respective rates
